# Supplementary material
Source: MDPI journal article supplement (https://www.mdpi.com/2624-8549/4/4/92)
Supplement: s1 [file s1 › chemistry-1971455-supplementary.pdf]

## Supporting Information

### Selective Recognition and Reversible “Turn-Off” Fluorescence Sensing of Acetate ( $\text{CH}_3\text{COO}^-$ ) Anion at ppb Level Using a Simple Quinizarin Fluorescence Dye

Mannanthara Kunhumon Noushija, Ananthu Shanmughan, Binduja Mohan, and Sankarasekaran Shanmugaraju\*

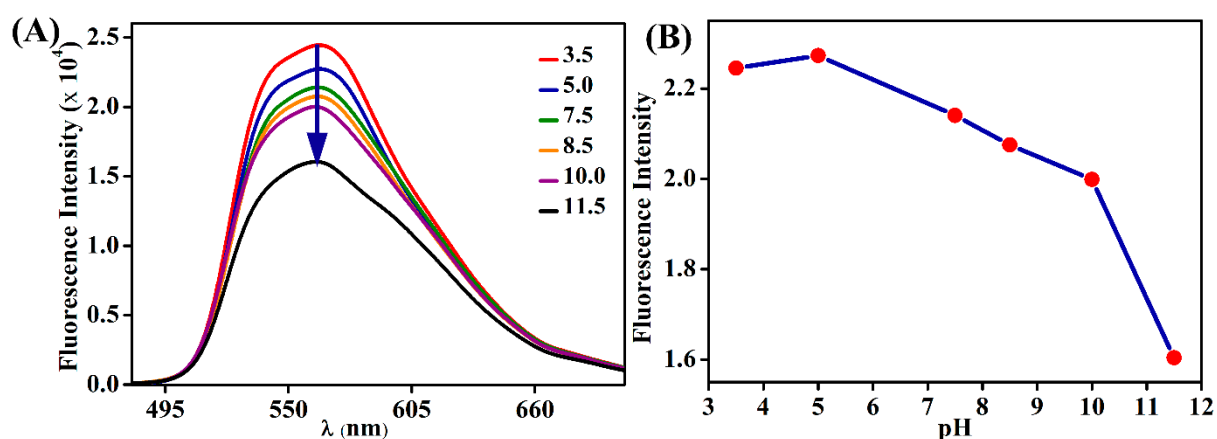

**Figure S1.** (A) pH-dependent emission titration for **QZ** measured in the DMSO solution; (B) corresponding plot of emission intensity (monitored at  $\lambda = 562$  nm) vs pH showing that the fluorescence intensity is low at basic pH.

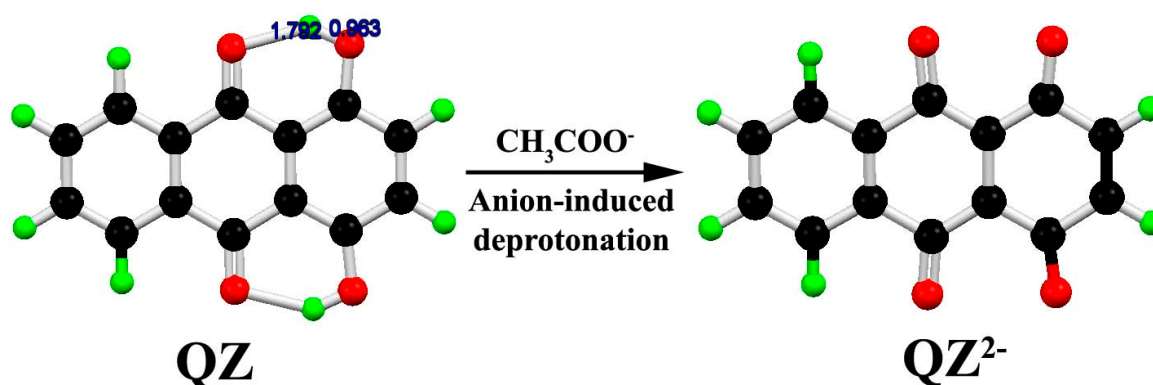

**Figure S2.** Energy-minimized structures of sensor **QZ** before and after binding with  $\text{CH}_3\text{COO}^-$  anion leads to the formation of anion-induced deprotonation of **QZ<sup>2-</sup>**.

**Table S1.** Comparison of sensing properties of various reported small-molecule fluorescence sensors with quinizarin sensor reported in this article.

| Sensor                                                                              | Emission Maxima ( $\lambda_{\text{max}}$ ) | Selectivity for                                                        | Binding constant for $\text{CH}_3\text{COO}^-$                                                                               | LoD                            | [Ref.] |
|-------------------------------------------------------------------------------------|--------------------------------------------|------------------------------------------------------------------------|------------------------------------------------------------------------------------------------------------------------------|--------------------------------|--------|
| 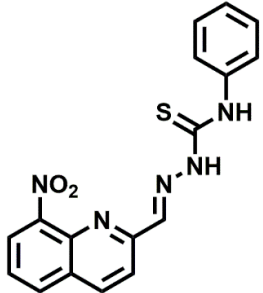   | 468 nm                                     | $\text{CH}_3\text{COO}^-$<br>$\text{F}^-$<br>$\text{H}_2\text{PO}_4^-$ | $K_a = 1.20 \pm 0.41 \text{ L mol}^{-1}$ (from fluorescence)<br>$K_a = 1.95 \pm 0.93 \text{ L mol}^{-1}$ (from absorbance)   | N/A                            | [50]   |
| 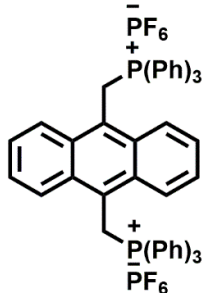  | 429 nm<br>451 nm                           | $\text{CH}_3\text{COO}^-$                                              | $K_a = 15.29 \pm 0.31 \text{ L mol}^{-1}$ (from fluorescence)<br>$K_a = 15.78 \pm 0.19 \text{ L mol}^{-1}$ (from absorbance) | N/A                            | [51]   |
| 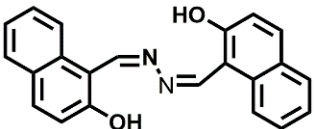 | 621 nm                                     | $\text{CH}_3\text{COO}^-$<br>$\text{Al}^{3+}$                          | $K_{\text{SV}} = 5.67 \times 10^4 \text{ M}^{-1}$                                                                            | $1.0 \times 10^{-7} \text{ M}$ | [52]   |
| 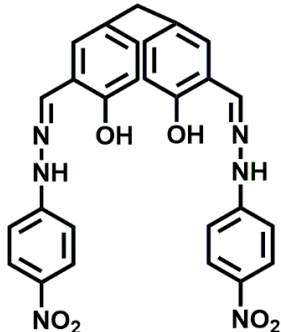 | 410 nm<br>560 nm                           | $\text{CH}_3\text{COO}^-$<br>$\text{F}^-$                              | $K_a = 12,500 \text{ L mol}^{-1}$ (from fluorescence)<br>$K_a = 5,556 \text{ L mol}^{-1}$ (from fluorescence)                | N/A                            | [53]   |
| 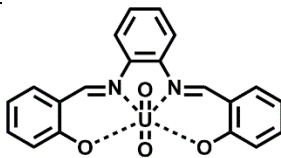 | 452 nm                                     | $\text{CH}_3\text{COO}^-$                                              | $K_a = 6.82 \pm 0.11$ (from fluorescence)                                                                                    | $2.5 \times 10^{-8} \text{ M}$ | [54]   |

|                                                                                     |        |                                                                        |                                                                                                                            |                                 |                  |
|-------------------------------------------------------------------------------------|--------|------------------------------------------------------------------------|----------------------------------------------------------------------------------------------------------------------------|---------------------------------|------------------|
| 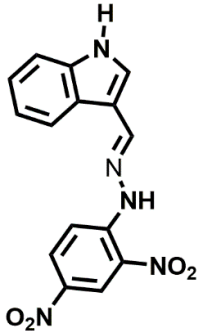   | 520 nm | $\text{CH}_3\text{COO}^-$<br>$\text{F}^-$<br>$\text{H}_2\text{PO}_4^-$ | $K_a = 1.27 \times 10^5 \text{ M}$ (from absorbance)                                                                       | N/A                             | [55]             |
| 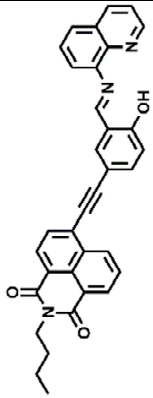   | 491 nm | $\text{CH}_3\text{COO}^-$<br>$\text{F}^-$<br>$\text{OH}^-$             | N/A                                                                                                                        | $1.32 \times 10^{-7} \text{ M}$ | [56]             |
| 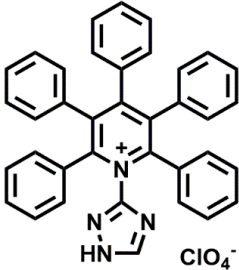  | 469 nm | $\text{CH}_3\text{COO}^-$<br>$\text{F}^-$                              | $K_a = 177500 \text{ M}^{-1}$ (from fluorescence)                                                                          | $1.09 \times 10^{-5} \text{ M}$ | [57]             |
| 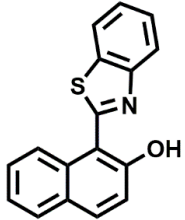 | 411 nm | $\text{CH}_3\text{COO}^-$                                              | $K_a = 2.6 \times 10^4 \text{ M}^{-1}$ (from absorbance)<br>$K_a = 4.0 \times 10^4 \text{ M}^{-1}$ (from fluorescence)     | $4.4 \times 10^{-5} \text{ M}$  | [58]             |
| 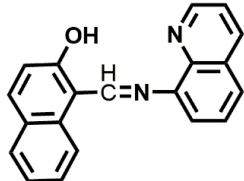 | 500 nm | $\text{CH}_3\text{COO}^-$                                              | N/A                                                                                                                        | $4.0 \times 10^{-7} \text{ M}$  | [59]             |
| 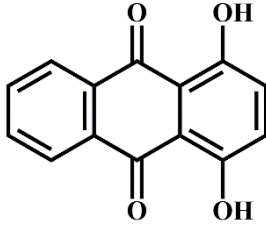 | 562 nm | $\text{CH}_3\text{COO}^-$                                              | $K_a = 7.63 \times 10^3 \text{ M}^{-1}$ (from absorbance)<br>$K_{sv} = 2.3 \times 10^3 \text{ M}^{-1}$ (from fluorescence) | $3.8 \times 10^{-8} \text{ M}$  | <b>This work</b> |

## References:

50. Shao, J. Quinoline-Based "On-Off" Fluorescent Sensor for Acetate: Effect of Link Mode between Binding Sites and Fluorophore on Fluorescence Changes. *Spectrosc. Lett.* **2012**, *45*, 262–268.
51. Huang, W.; Lin, H.; Lin, H. Fluorescent Acetate-Sensing in Aqueous Solution. *Sens. Actuators, B.* **2011**, *153*, 404–408.
52. Ghosh, A.; Sengupta, A.; Chattopadhyay, A.; Das, D. A Single Probe for Sensing Both Acetate and Aluminum(III): Visible Region Detection, Red Fluorescence, and Human Breast Cancer Cell Imaging. *RSC Adv.* **2015**, *5*, 24194–24199.
53. Liu, G.; Shao, J. Selective Ratiometric Fluorescence Detection of Acetate Based on a Novel Schiff Base Derivative. *J. Fluoresc.* **2012**, *22*, 397–401.
54. Hosseini, M.; Ganjali, M.R.; Veismohammadi, B.; Faridbod, F.; Abkenard, S.D.; Salavati-Niasarie, M. Selective Recognition of Acetate Ion Based on Fluorescence Enhancement Chemosensor. *Luminescence.* **2012**, *27*, 341–345.
55. Li, Y.; Lin, H.; Cai, Z.; Lin, H. Colorimetric Sensing of Biologically Important Acetate Ion Based on Indole Derivation. *Mini-Rev. Org. Chem.* **2011**, *8*, 25–30.
56. Zhao, L.Y.; Wang, G.K.; Chen, J.H.; Zhang, L.M.; Liu, B.; Zhang, J.F.; Zhao, Q.H.; Zhou, Y. 1,8-Naphthalimide-based Visible Colorimetric Sensor for the Selective Sensing of Fluoride, Acetate, and Hydroxyl Anions. *J. Fluorine Chem.* **2014**, *158*, 53–59.
57. Wang, G.; Zheng, T.; Zhang, S.; Ye, J.; Ning, G. Fluorescence Chemosensor for Acetate Ion and Fluorine Ion based on 1,2,4-Triazolyl Substituted Pentaphenylpyridinium. *J. Mol. Struct.* **2021**, *1230*, 129918.
58. Goswami, S.; Das, A.K.; Aich, K.; Manna, A. Competitive Intra- and Inter-Molecular Proton Transfer in Hydroxynaphthyl Benzothiazole: Selective Ratiometric Sensing of Acetate. *Tetrahedron Lett.* **2013**, *54*, 4215–4220.
59. Lin, Q.; Liu, X.; Wei, T.B.; Zhang, Y.M. TICT–ICT State Change Mechanism-based Acetate Fluorescent Sensor Act as an "Off–On–Off" Switch and Logic Gate. *Sens. Actuators, B.* **2014**, *190*, 459–463.
